# Supplementary material for: Effects of ferulic acid esterase-producing Lactobacillus fermentum and cellulase additives on the fermentation quality and microbial community of alfalfa silage
Source: PeerJ. 2019 Oct 8;7:e7712. doi: 10.7717/peerj.7712 (PMC6788448; doi:10.7717/peerj.7712)
Supplement: Table S1 [file peerj-07-7712-s001.xlsx]

## Sheet: Sheet1
Item	S1(1)	S1(2)	S1(3)	S2(1)	S2(2)	S2(3)
DM%	22.613	24.01	24.822	29.032	30.021	29.843
LAB (log10 cfu/g)	<3	<3	<3	<3	<3	<3
Yeast (log10 cfu/g)	4.38021	4.35411	4.40483	4.07918	4.07188	4.08636
Mold (log10 cfu/g)	4.20412	4.19866	4.20952	3.90309	3.77815	4.0086
CP (%DM)	22.28	22.97	22.624	25.54	25.13	25.35
NDF (%DM)	38.37	38.41	38.389	33.03	33.46	33.545
ADF (%DM)	29.68	29.77	29.726	25.14	25.93	25.536
WSC (%DM)	1.65	1.42	1.536	1.75	1.84	1.796
Observed species	262	230	257	153	189	183
Shannon	2.35747	1.45408	1.99683	1.02442	0.97766	1.00712
Simpson	0.305197	0.380603	0.291991	0.587128	0.623161	0.624493
ACE	281.914	397.379	303.641	273.204	269.385	244.121
Chao 1	287.5	342.588	299.558	233.455	245.95	246.033
Coverage	0.998987	0.997378	0.998182	0.998212	0.997974	0.998153
