# Supplementary material for: Effects of ferulic acid esterase-producing Lactobacillus fermentum and cellulase additives on the fermentation quality and microbial community of alfalfa silage
Source: PeerJ. 2019 Oct 8;7:e7712. doi: 10.7717/peerj.7712 (PMC6788448; doi:10.7717/peerj.7712)
Supplement: Table S3 [file peerj-07-7712-s002.xlsx]

## Sheet: Sheet1
Item	S1-CK(1)	S1-CK(2)	S1-CK(3)	S1-CE(1)	S1-CE(2)	S1-CE(3)	S1-LF(1)	S1-LF(2)	S1-LF(3)	S1-LF+CE(1)	S1-LF+CE(2)	S1-LF+CE(3)		S2-CK(1)	S2-CK(2)	S2-CK(3)	S2-CE(1)	S2-CE(2)	S2-CE(3)	S2-LF(1)	S2-LF(2)	S2-LF(3)	S2-LF+CE(1)	S2-LF+CE(2)	S2-LF+CE(3)
pH value	6.87	6.74	6.81	5	5.06	4.97	5.41	5.33	5.47	4.66	4.61	4.72		6.09	6.02	6.15	5.05	5.07	5.11	5.38	5.42	5.18	4.78	4.69	4.81
LAB (log10 cfu/g)	6.91593	6.86923	6.85248	7.31639	7.38021	7.35334	7.32222	7.33806	7.28601	7.34242	7.3941	7.4014		6.83506	6.85854	6.77815	7.20412	7.43902	7.41363	7.50515	7.50732	7.64345	7.38021	7.33325	7.34242
Yeast (log10 cfu/g)	4.60206	4.62325	4.60206	0	0	0	0	0	0	0	0	0		4.60206	4.50515	4.47712	0	0	0	0	0	0	0	0	0
Mold (log10 cfu/g)	0	0	0	0	0	0	0	0	0	0	0	0		0	0	0	0	0	0	0	0	0	0	0	0
